# Supplementary material
Source: Springer Nature journal article supplement (http://www.springermedizin.de/resource/supplementary/13075_2010_9695_MOESM7_ESM.pdf/9693554)

# Stiffness

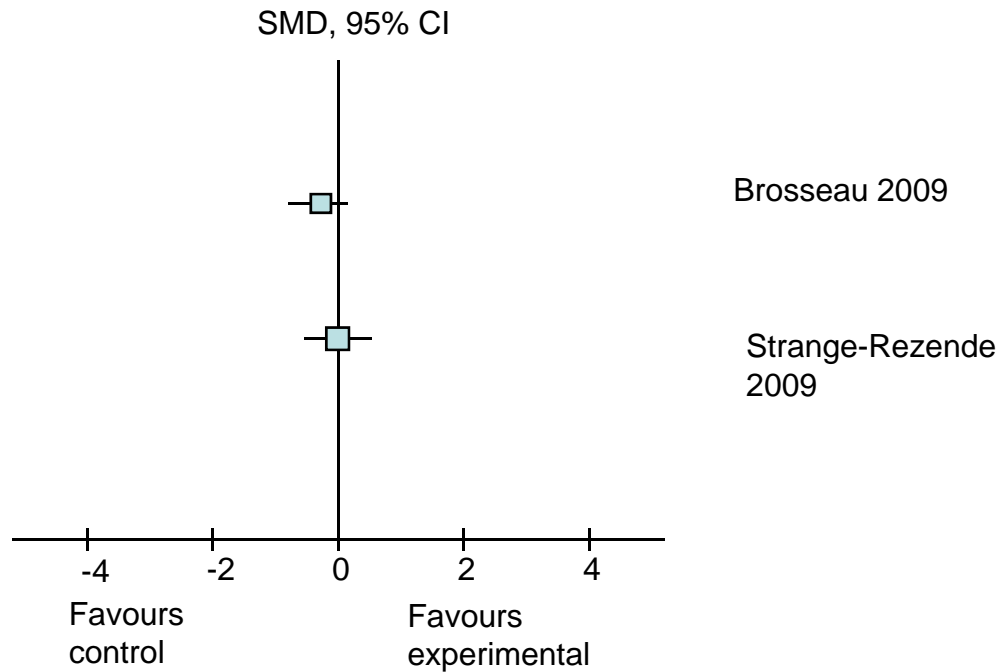

Supplement: MOESM7 [file 9693554]
